# Supplementary material for: A library of synthetic transcription activator-like effector-activated promoters for coordinated orthogonal gene expression in plants
Source: PubMed Central journal article supplement (PMC4691316; doi:10.1111/tpj.12843), 2015-04-29
Supplement: tpj0082-0707-sd1.pdf [file tpj0082-0707-sd1.pdf]

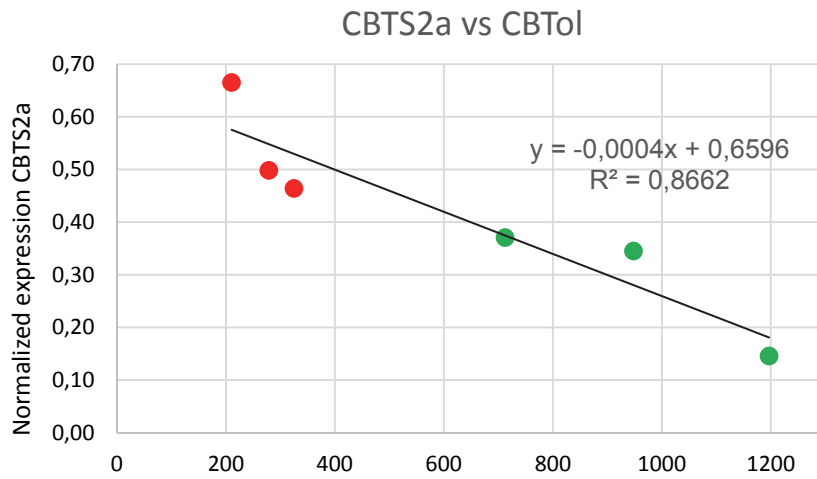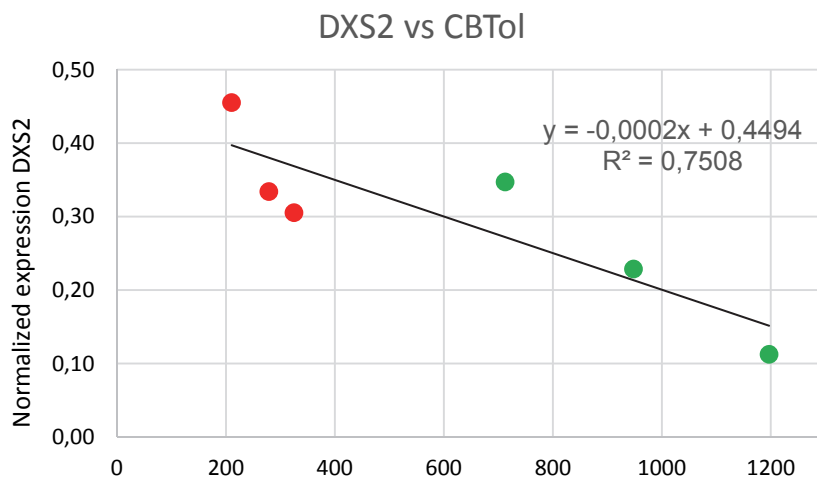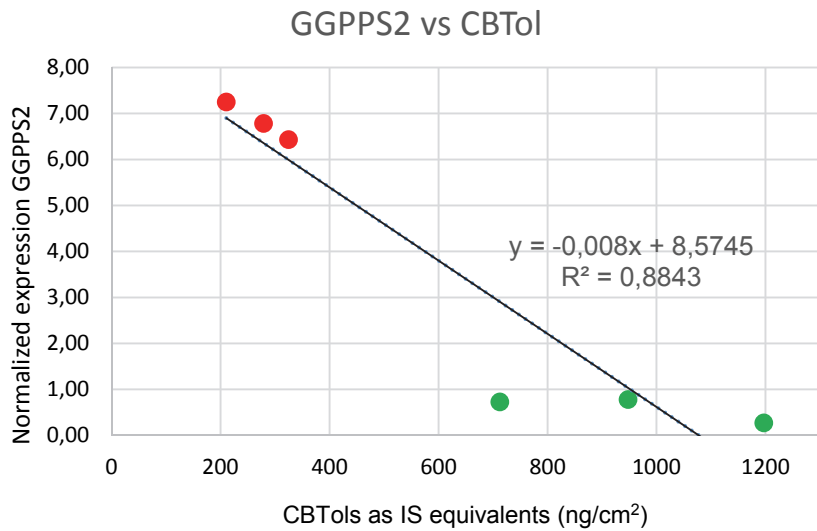

**Supplemental Figure 1. Correlation between gene expression and CBTol levels.**

Expression data from Figure 5 was plotted against CBTol levels. Trend lines and their corresponding parameters are shown. Red and green dots correspond to samples with the STAPs and 35S promoter respectively.
