# Supplementary material for: A library of synthetic transcription activator-like effector-activated promoters for coordinated orthogonal gene expression in plants
Source: PubMed Central journal article supplement (PMC4691316; doi:10.1111/tpj.12843), 2015-04-29
Supplement: tpj0082-0707-sd2.pdf [file tpj0082-0707-sd2.pdf]

## Supplemental data

### 1. Sequences of the STAPs

The 19 base long DNA binding site of the TALE is indicated in bold letters

>PAGT582\_1

GGAGGTTATCACACTTGGTAATTT**CCCCGCATAGCTGAACAT**CTATACAACACTCATCG  
CGCGGAGAAACGCGCAACAAATTGGAGGCGCATTAAATG

>PAGT582\_2

GGAGCTTACGTAGCAGCACGGCCT**CCCCGCATAGCTGAACAT**CTATATAAATCTTAGCC  
CGACTGCACCGTGAGGAAAAGAGGGTTTATATATAATG

>PAGT582\_3

GGAGGTCGTCAAATGATAAGTACT**CCCCGCATAGCTGAACAT**CTATATAACGCAGCAAA  
TGTTGAAACGTATTAGCAACAGCTAACCTTCGAATGT

>PAGT582\_4

GGAGGCGTGTTCGTTTTAGTGAGGT**CCCCGCATAGCTGAACAT**CTATATAAGGTTTTGCT  
ATTCATTGAAAGCAGTAGTACTGATTTGTATATAATG

>PAGT582\_5

GGAGGTTCTGTGGGTTTTTTGGGT**CCCCGCATAGCTGAACAT**CTATATAATGAGAAACA  
GGGGCAAATCCCCGAAAACAAATAACGCGAAGCAATG

>PAGT582\_7

GGAGATGTGCCATGGTTCGGGGGCT**CCCCGCATAGCTGAACAT**CTATATAATCGGAATG  
AATTGCAAATAGGGATGTTATAGGGTTATCTCGGCAATG

>PAGT582\_8

GGAGAGATGATTGTTTCGTAATATT**CCCCGCATAGCTGAACAT**CTATATAAGAGACGAGC  
TACCACGATAAGCGCAGCAAAAGACACATACGTTAATG

>PAGT582\_9

GGAGGTGCCTTTTTAAAGGGTTT**CCCCGCATAGCTGAACAT**CTATATAAGAAACACGG  
ACGCCGAAACCCCCCGCCTAGTTGACTCTCCGGAATG

>PAGT582\_10

GAGTGTGAACGTGGTGATGTGGT**CCCCGCATAGCTGAACAT**CTATATAAAAACGTAAAC  
AGAAGTCTGCTCAACTAGTCTCCAACATATAAATG

>PAGT582\_13

GGAGGTAAGTTCTGGCCTCTGGGT**CCCCGCATAGCTGAACAT**CTATATAATAGGACAG  
TAAGATATGCCAGACAATGTAGCACGTAGAACGGAAATG

>PAGT582\_14

GGAGCACCTTGGAACAGGTGGT**CCCCGCATAGCTGAACAT**CTATATAAGAAATTAGT  
AACTACGCTTTCAAAGACATCTTAATTAATTAGAATG

>PAGT582\_15

GGAGAGTGGGCGCGTTTTGGTAAGT**CCCCGCATAGCTGAACAT**CTATATAAATAAGCTG  
CCTACGATTTAGCGCGACACAATTCGACGGTTGGAATG

>PAGT582\_21

GGAGGCCGTGGGGGGGGGTCTGT**CCCCGCATAGCTGAACAT**CTATATAATACCGGTT  
ATCCAGCGACAACCGTCAATAACTTAACATTGAACAATG

>PAGT582\_23

GGAGTTAAGTAGGCTGTTCTTATT**CCCCGCATAGCTGAACAT**CTATATAAATAGCTCAGT  
TGCCTTAAACGTAGACAGTCTATTACACTAATAAATG

>PAGT582\_24

GGAGGTTTATACTTTCTCTAATTT**CCCCGCATAGCTGAACAT**CTATATAAACTGGAACCTT  
TCACTGACCTGACAGTGCTTTCATTGACGCGCGAATG

>PAGT582\_25

GGAGAAGCTCACCTGCATCCTTGT**CCCCGCATAGCTGAACAT**CTATATAAAATTTATAC  
ATTTAAACCAAACCCCTATAAAATTTCTGTCCGCGAATG

>PAGT582\_29

GGAGTAATGTACAGCTTCGCGGGCT**CCCCGCATAGCTGAACAT**CTATATAATAACTGTTC  
TACATACTCTCGGATAAATAACGCAACTTAATATAATG

>PAGT582\_30

GGAGTCCCGGATCCTGGTTTCACT**CCCCGCATAGCTGAACAT**CTATATAAAACAAATCT  
CGTCAAGCAAACCAATTACGATGGTCCGGGAAGGAATG

>PAGT582\_34

GGAGGGGTGGGGGGGTTACCGTCT**CCCCGCATAGCTGAACAT**CTATATAAAACCAATC  
GACGACTCATTGGAATGCGTCCTGCTCCAAATAGCAATG

>PAGT582\_36

GGAGCTGCAATGCTTACTGTTATT**CCCCGCATAGCTGAACAT**CTATATAAAGGTTGAGA  
AGTGCACTTGCAATAATTGCCGGGCCCATGGGAAATG

>PAGT582\_37

GGAGAGAGGTGGGTTCGCGGGCATT**CCCCGCATAGCTGAACAT**CTATATAAAAAGCAGT  
TCATACGGGAACGCAGACTAGTCACGAAATTCGCAATG

>PAGT582\_38

GGAGGCGCGTTTGATTGGGGGGGT**CCCCGCATAGCTGAACAT**CTATATAAAACTGATA  
ACTTAGTCAGACTAGCAAATGCTCACAATACAAAGAATG

>PAGT582\_39

GGAGGAACCGCGGTTTCGGGAGCGT**CCCCGCATAGCTGAACAT**CTATATAACAGGGGC  
GGGATATGATATAGAAACACCAGGGTTAGTAACAAGAATG

>PAGT582\_40

GGAGCAATGGCAGAGGGGTATGGT**CCCCGCATAGCTGAACAT**CTATATAAAATTGGGA  
CCTATGATAATGCTGTAGAACCTCATAAATGATGGAATG

>PAGT582\_41

GGAGGGTTTGTACCGTGTATTCT**CCCCGCATAGCTGAACAT**CTATATAACGAGCGGTC  
GAAAGCTTCAAATTCATGAGTAAGACCCCAACAATG

>PAGT582\_42

GGAGTCTTGCCCATACTCAGTTCT**CCCCGCATAGCTGAACAT**CTATATAATGTCTCTCG  
AATGACACCGATACTTCGATTTAGCAGGCTGCCCAATG

>PAGT582\_43

GGAGGCATTACGGGCGTAGTTTGT**CCCCGCATAGCTGAACAT**CTATATAATCGACCAG  
AGCAACGTTCTCGCCTAGGCGCGCCTTACCGGGAAAATG

>PAGT582\_44

GGAGGTATCCCGAGGGCGAATGG**TCCCGCATAGCTGAACAT**CTATATAAGGCATCTG  
GTTAGCAAGCCTCACCAGCCGTGAACAATATAATCAATG

>PAGT582\_45

GGAGTCAGAGTGTGGTTCGTGTTTT**TCCCGCATAGCTGAACAT**CTATATAAGTTTACACC  
TGCCCGACCTATTCCTTGATGAGCTCGCGCACCGAATG

>PAGT582\_47

GGAGCACTTAGGTTAACTGCGCGT**TCCCGCATAGCTGAACAT**CTATATAAGGAACAGA  
CGGCTAACCCATCAATGGAACAACGAACGGCCATAATG

>PAGT582\_48

GGAGTGGTTTTAGCACAGACA**ACTTCCCGCATAGCTGAACAT**CTATATAAGGAACCGAC  
TCTCTCCCGCCCCGACACAGGACCCCTCTGGTAATG

>PAGT582\_52

GGAGCATGCTGGGGTTGGAGGGGT**TCCCGCATAGCTGAACAT**CTATATAACCCGGCC  
CCTCAATTAACCCCTGCTCAAAGCAAAGCAACAATCAATG

>PAGT582\_53

GGAGTGGGCTGAGGGGGACGGGT**TCCCGCATAGCTGAACAT**CTATATAACCCAACGT  
GAGATCACGTTTACAATACTCGTCTTGACTGACACAATG

>PAGT582\_54

GGAGGGCATGAGGTTAGCTAGTTT**TCCCGCATAGCTGAACAT**CTATATAATGAATGTGT  
GAGAAGCTTTGACAAGCTTCGCCAGCGGCCCTAAATGT

>PAGT582\_56

GGAGATATTCCTCGGCTGTC**ACTTCCCGCATAGCTGAACAT**CTATATAATCAAATTCCT  
AGGGGCTGCCATGGTTACCCCTTGCTATGTAGCAATG

>PAGT582\_58

GAGTGCGGGGAGTTGGTATGGGT**TCCCTGCATAGCTGAACAT**CTATATAAATAACGGCC  
CTGAGTGTCGCTAGCAAATGCACCAAACCAACTCAATG

>PAGT582\_60

GGAGCGATATGTTTAAATCGGCAT**TCCCGCATAGCTGAACAT**CTATATAAATCCGCGCC  
TTAAATACGGTTGTTTGCCTATTTTGAGCGAGTAAATG

>PAGT582\_62

GGAGTATTGGTCCACTTGCTCCGT**TCCCGCATAGCTGAACAT**CTATATAACGCAGAAAC  
CTCGCAACTGACGTTCCGATTGCGATAAACACACAATG

>PAGT582\_65

GGAGTTGTAAACTCCAGGTTAGAT**TCCCGCATAGCTGAACAT**CTATATAAATCGCCCAT  
TGCCAGGACACGCAACCCTGCAACAATCAGTACAATG

>PAGT582\_69

GGAGCCCTTGCTATGACGATGCCT**TCCCGCATAGCTGAACAT**CTATATAAAAATTCCAT  
AACGTACAGAACGAAGAACGGACCCATATACAATAATG

>PAGT582\_73

GGAGGCGCGGGCAGGGGTTGGGT**TCCCGCATAGCTGAACAT**CTATATAATCACCCAA  
CGCCGCATGCAACA**ACTAGTAACA**AGGCCATTGAGAATG

>PAGT582\_78

GGAGCTTTTTACGGGGCACCTGTT**CCCCGCATAGCTGAACAT**CTATATAACAAAATAAC  
AGATTGTCTGTCCAAGAGGCAGACATTCGTTCATAATG

## 2. Sequences of the primers used for quantitative gene expression analysis

NsCBTS2a-1106F, 5'- CGATCCAAAGATGGGACGA-3',

NsCBTS2a-1257R, 5'- CATCTCTTTTTTCGCATAGTAGATGT-3',

NtGGPPS2-85F, 5'- CCTCCACAGAGACATTCTTATAGTTTC-3',

NtGGPPS2-227R, 5'- TCAAAGTCAAACCTTAGGCAAGATG-3',

SIDXS2-556F, 5'- AGCATCTCCGCTGGTCTT-3',

SIDXS2-699R, 5'- CGAGTCAAGGAATCCTGCAT-3'.
